# Supplementary material for: Inference of Gorilla Demographic and Selective History from Whole-Genome Sequence Data
Source: PubMed Central journal article supplement — Mol Biol Evol. 2015 Jan 21;32(3):600–12. doi: 10.1093/molbev/msu394 (PMC4327160; doi:10.1093/molbev/msu394), 2015-01-21
Supplement: supp_msu394_Supplementary_Table_S1.pdf [file supp_msu394_Supplementary_Table_S1.pdf]

**Supplemental Table 1. Sample information**

| Species                | subspecies     | ID     | Name     | Studbook | Sex | Source             | Geographic Origin                                         | Birth Origin | Sequencing Center | Sequencing coverage |
|------------------------|----------------|--------|----------|----------|-----|--------------------|-----------------------------------------------------------|--------------|-------------------|---------------------|
| <i>Gorilla gorilla</i> | <i>gorilla</i> | A930   | Sandra   | 969      | F   | Blood              | 1st generation by 566 and 530 both wild born<br>Cameroon  | Captive born | CNAG              | 27.7                |
| <i>Gorilla gorilla</i> | <i>gorilla</i> | A931   | Banjo    | 255      | M   | Blood              | Cameroon                                                  | Wild born    | CNAG              | 31.3                |
| <i>Gorilla gorilla</i> | <i>gorilla</i> | A933   | Dian     | 1091     | F   | Blood              | 1st generation by 856 and 858, both wild born<br>Cameroon | Captive born | CNAG              | 42.1                |
| <i>Gorilla gorilla</i> | <i>gorilla</i> | A962   | Amani    | 899      | F   | Blood              | 1st generation of wild African parents                    | Captive born | CNAG              | 31                  |
| <i>Gorilla gorilla</i> | <i>gorilla</i> | KB3782 | Vila     | 80       | F   |                    | Unknow                                                    | Wild born    | Stanford          | 13.2                |
| <i>Gorilla gorilla</i> | <i>gorilla</i> | KB3784 | Dolly    | 195      | F   |                    | Congo                                                     | Wild born    | Stanford          | 17.5                |
| <i>Gorilla gorilla</i> | <i>gorilla</i> | KB5792 | Carolyn  | 3        | F   |                    | Congo                                                     | Wild born    | Stanford          | 12.7                |
| <i>Gorilla gorilla</i> | <i>gorilla</i> | KB5852 | Helen    | 96       | F   |                    | Cameroon                                                  | Wild born    | Stanford          | 15.6                |
| <i>Gorilla gorilla</i> | <i>gorilla</i> | KB6039 | Oko      | 192      | F   |                    | Unknown                                                   | Wild born    | Stanford          | 16.4                |
| <i>Gorilla gorilla</i> | <i>gorilla</i> | KB7973 | Porta    | 64       | F   |                    | Unknown                                                   | Wild born    | Stanford          | 13                  |
| <i>Gorilla gorilla</i> | <i>gorilla</i> | X00108 | Abe      | 52       | F   |                    | Unknown                                                   | Wild born    | CNAG              | 21.2                |
| <i>Gorilla gorilla</i> | <i>gorilla</i> | X00109 | Tzambo   | 440      | F   |                    | Unknown                                                   | Wild born    | CNAG              | 22.5                |
| <i>Gorilla gorilla</i> | <i>delhi</i>   | B646   | Nyango   | 9941     | F   | Whole Blood        | West Africa (Cameroon), possibly cross river              | Wild born    | CNAG              | 23.8                |
| <i>Gorilla gorilla</i> | <i>graueri</i> | A967   | Victoria | A967     | F   | Heparine Blood     | DRC - Walikale region, Nord-Kivu                          | Wild born    | CNAG              | 36.7                |
| <i>Gorilla gorilla</i> | <i>graueri</i> | 9732   | Mkubwa   | 9907     | M   | Primary fibroblast | DRC - Tulakwa, Northwest of Bukavu                        | Wild born    | WashU             | 18.9                |
