# Supplementary material for: Inference of Gorilla Demographic and Selective History from Whole-Genome Sequence Data
Source: PubMed Central journal article supplement — Mol Biol Evol. 2015 Jan 21;32(3):600–12. doi: 10.1093/molbev/msu394 (PMC4327160; doi:10.1093/molbev/msu394), 2015-01-21
Supplement: supp_msu394_Supplementary_Tables_S2_S4-5_Figs_S2-7.pdf [file supp_msu394_Supplementary_Tables_S2_S4-5_Figs_S2-7.pdf]

| Sample                                                       | Ancestral $N_e$ | Time in past of first size change (years) | $N_e$ after first change | Time in past of second size change (years) | $N_e$ after second change |
|--------------------------------------------------------------|-----------------|-------------------------------------------|--------------------------|--------------------------------------------|---------------------------|
| 1 <sup>st</sup> side of cline (12 haplotypes)                | 33,191          | 539,816                                   | 50,716                   | 39,023                                     | 8,132                     |
| 2 <sup>nd</sup> side of cline (16 haplotypes)                | 32,676          | 743,772                                   | 45,321                   | 38,741                                     | 10,659                    |
| 2 <sup>nd</sup> side of cline (downsampled to 12 haplotypes) | 32,809          | 648,295                                   | 47,507                   | 48,996                                     | 11,808                    |
| All western lowland samples (downsampled to 12 haplotypes)   | 32,542          | 746,901                                   | 46,144                   | 29,060                                     | 9,014                     |

**Table S2: Three-epoch demographic model results from  $\partial\alpha\partial i$  for individuals on either side of a putative cline.**

Inferences based on subsets of the western lowland gorilla samples, using the 8x data. Samples on the 1<sup>st</sup> side of cline: KB3782, KB3784, KB5792, KB5852, KB7973, X00109. Samples on the 2<sup>nd</sup> side of cline: A930, A931, A933, A936, A937, A962, KB6039, X00108.

**Table S3: CLR Window**

| <b>GO ID</b> | <b>Term</b>                                                                                      | <b>p-value</b> |
|--------------|--------------------------------------------------------------------------------------------------|----------------|
| GO:0035725   | sodium ion transmembrane transport                                                               | 0.00039        |
| GO:0006166   | purine ribonucleoside salvage                                                                    | 0.00077        |
| GO:0050909   | sensory perception of taste                                                                      | 0.00188        |
| GO:2000736   | regulation of stem cell differentiation                                                          | 0.00512        |
| GO:0030157   | pancreatic juice secretion                                                                       | 0.00519        |
| GO:0046541   | saliva secretion                                                                                 | 0.00519        |
| GO:0090257   | regulation of muscle system process                                                              | 0.00544        |
| GO:0051983   | regulation of chromosome segregation                                                             | 0.00582        |
| GO:0060964   | regulation of gene silencing by miRNA                                                            | 0.00685        |
| GO:0086012   | membrane depolarization during cardiac muscle cell action potential                              | 0.00685        |
| GO:0086019   | cell-cell signaling involved in cardiac conduction                                               | 0.00685        |
| GO:1900153   | positive regulation of nuclear-transcribed mRNA catabolic process, deadenylation-dependent decay | 0.00685        |
| GO:2000270   | negative regulation of fibroblast apoptotic process                                              | 0.00685        |
| GO:0030071   | regulation of mitotic metaphase/anaphase transition                                              | 0.00739        |
| GO:0050709   | negative regulation of protein secretion                                                         | 0.00739        |
| GO:0019319   | hexose biosynthetic process                                                                      | 0.00825        |

**Table S4: Top enriched GO terms from TopGo.**

Results based on the Fisher's exact test and the elimination method by Alexa et al. (2006). All genes in regions with  $p < 10^{-3}$  were included. The 16 terms with  $p < 0.01$  are listed.

Alexa A, Rahnenfuhrer J, Lengauer T. 2006. Improved scoring of functional groups from gene expression data by decorrelating GO graph structure. *Bioinformatics*. 22(13):1600-1607.

| Paper                      | Method    | Data                                   | Cross River-Western split time (kyr) | Cross River-Western split time (kyr, adjusted) | Western-Eastern split time (kyr) | Western-Eastern split time (kyr, adjusted) | Migration                                                                                                               |
|----------------------------|-----------|----------------------------------------|--------------------------------------|------------------------------------------------|----------------------------------|--------------------------------------------|-------------------------------------------------------------------------------------------------------------------------|
| Thalmann et al, 2011       | ABC       | 8 micro-satellite loci                 | 17.8                                 |                                                |                                  |                                            | 4.5 migrants per generation, symmetric                                                                                  |
| Becquet et al, 2007        | MIMMAR    | 15 loci                                |                                      |                                                | 92                               | 171                                        | M=0.87, symmetric                                                                                                       |
| Scally et al, 2012         | Custom-IM | Genome wide, reduced representation    |                                      |                                                | 500                              | 429                                        | 0.2 migrants per generation, symmetric                                                                                  |
| Prado-Martinez et al, 2013 | PSMC      | Genome wide                            | 80                                   | 114                                            | 150                              | 214                                        | none                                                                                                                    |
| Mailund et al, 2012        | CoalHMM   | 95 loci (10Mbp interval between locus) |                                      |                                                |                                  | 450                                        | gene flow ended 150kr ago                                                                                               |
| Thalmann et al, 2007       | IM        | 16 loci                                |                                      |                                                | 78*                              | 107                                        | more gene flow from eastern to western gorilla after initial split at around 0.9-1.6 mya, no gene flow until 78 kyr ago |
| This study                 | G-PHOCS   | 25,573 loci                            |                                      | 68                                             |                                  | 261                                        | Western --> Eastern, 0.37 migrants per generation                                                                       |

**Table S5: Comparison of published estimates of gorilla population split times.**

Values from each study are adjusted to match the generation time and mutation rates employed in this study. A mutation rate adjustment is not performed for Thalmann et al (2011), which is based on microsatellites. We note that Thalmann et al (2007) report a range of split time values under several different models, with population split times ranging from 78 kya (without subsequent gene flow) to 1.6 mya, with some models including Eastern to Western migration.

## Supplementary Figures

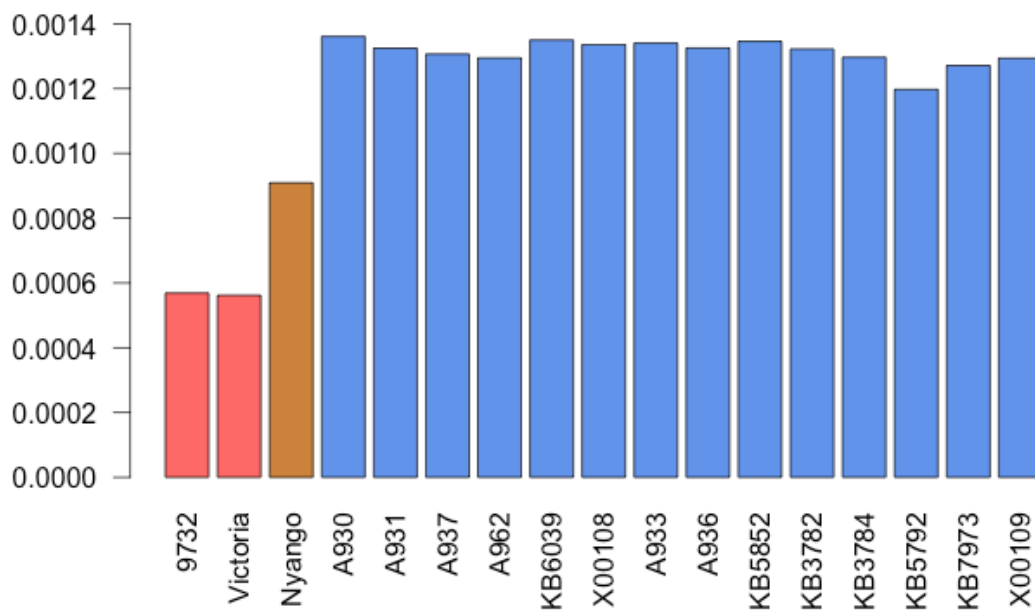

**Figure S1: Genome wide heterozygosity values.**

Heterozygosity was calculated along the autosomes for each sample based on the 8x coverage masks. Samples are colored based on species: eastern lowland (red), Cross River (yellow), and western lowland (blue).

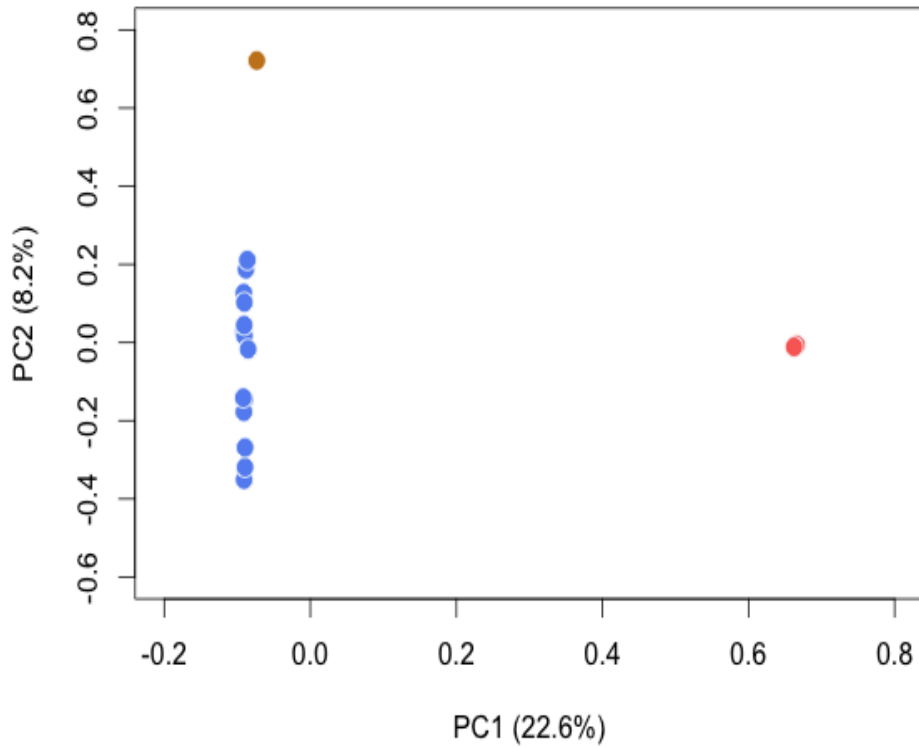

**Figure S2: PCA of three gorilla species.** Colors indicate species: Cross River (brown), western lowland (blue), and eastern lowland (red). Data was thinned to include 20% of the total number of intersecting SNPs. Percentages indicate the percent of variance explain by each principle component.

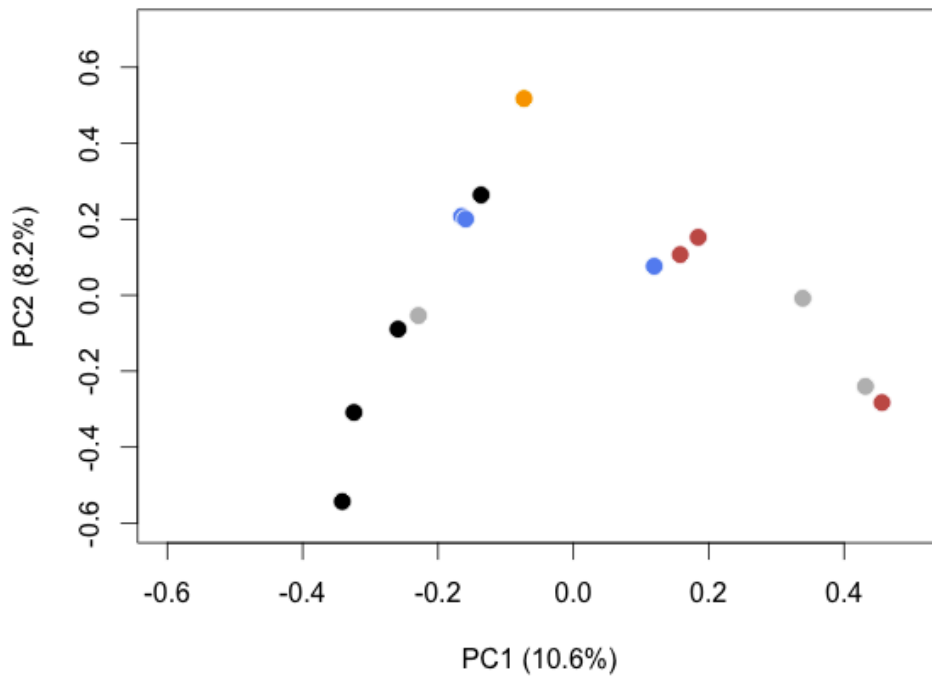

**Figure S3: PCA of western lowland gorilla.**

PCA of 14 western lowland gorillas based on 8x sequencing data. Colors indicate geographical origin: Equatorial Guinea (orange), Cameroon (blue), Congo (red), captive born (black), unknown origin (grey). Percentages indicate the percent of variance explained by each principle component.

**A.**

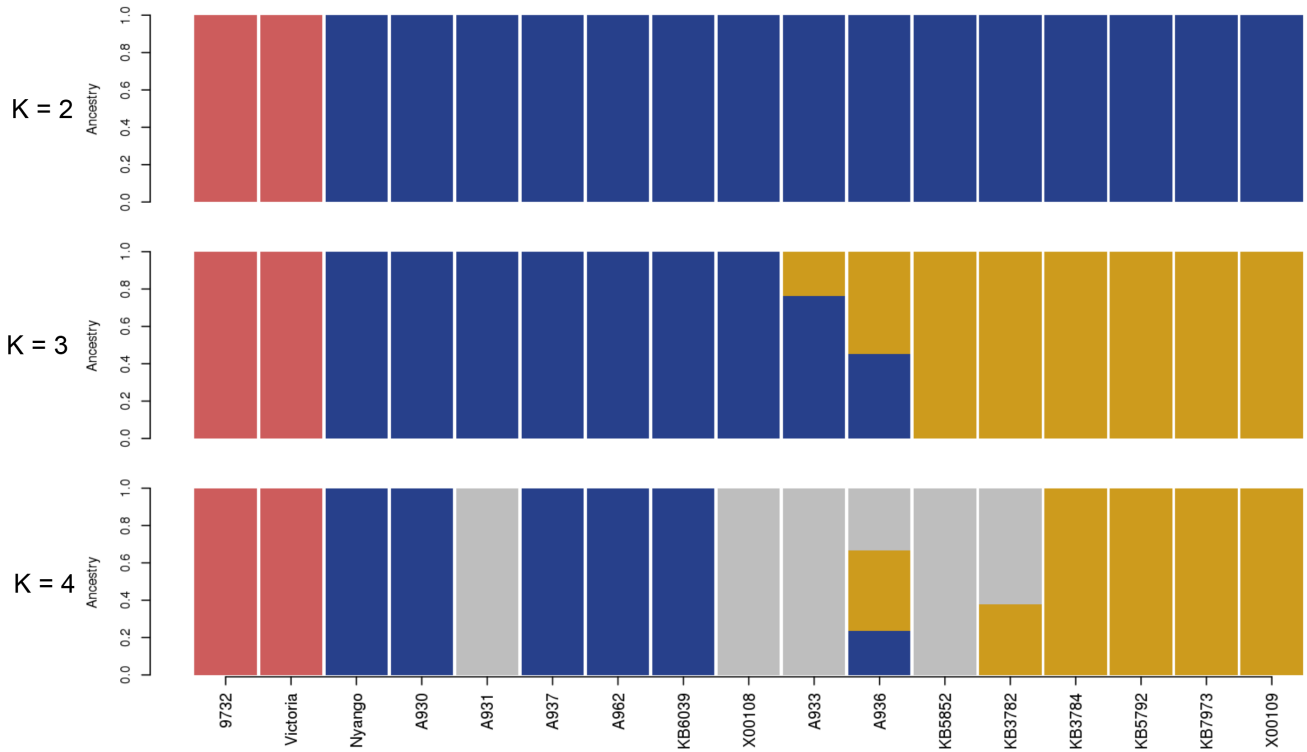

**B.**

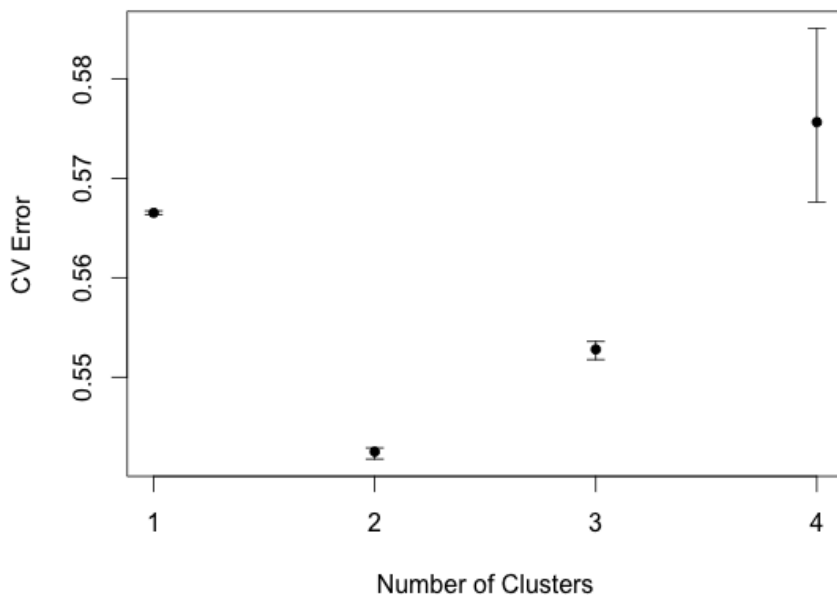

**Figure S4: Admixture results for the three gorilla subspecies.**

**A:** Population membership inferred from ADMIXTURE with 2 - 4 populations. **B:** Cross Validation Error from ADMIXTURE analyses on three gorilla subspecies. CV error is estimated for 10 independent runs, and the results from run with the CV error is shown in A.

**A.**

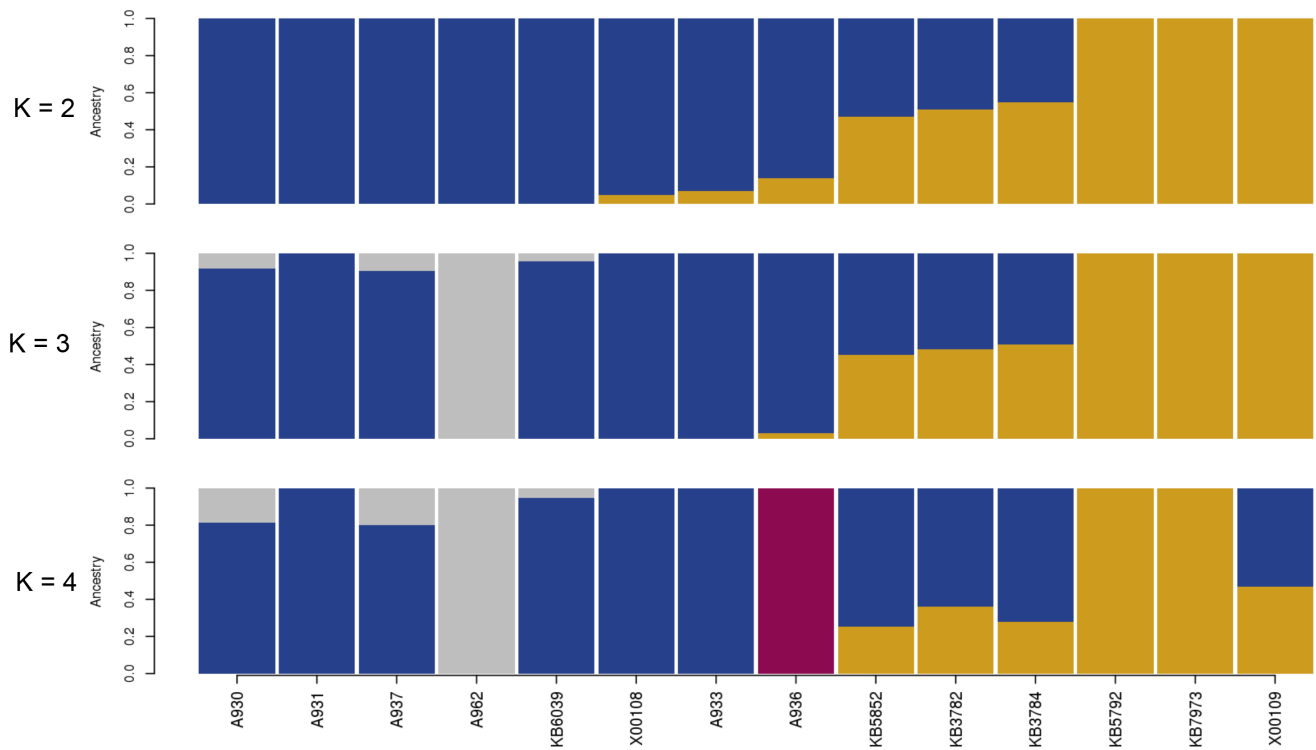

**B.**

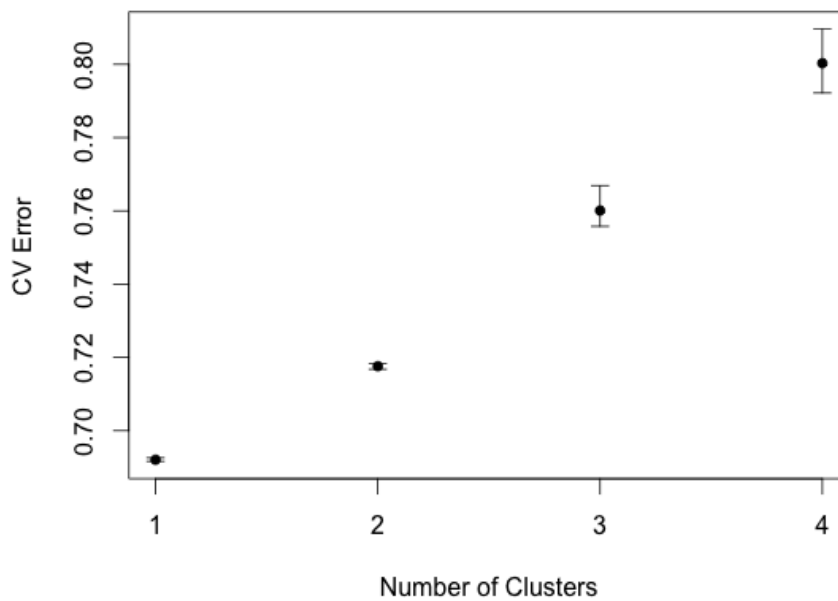

**Figure S5: Admixture assignment and CV Error for 14 western lowland gorillas.**

**A:** Population membership inferred from ADMIXTURE with 2 - 4 populations. **B:** Cross Validation Error from ADMIXTURE analyses on three gorilla subspecies. CV error is estimated for 10 independent runs, and the results from the runs with the lowest error is shown in A.



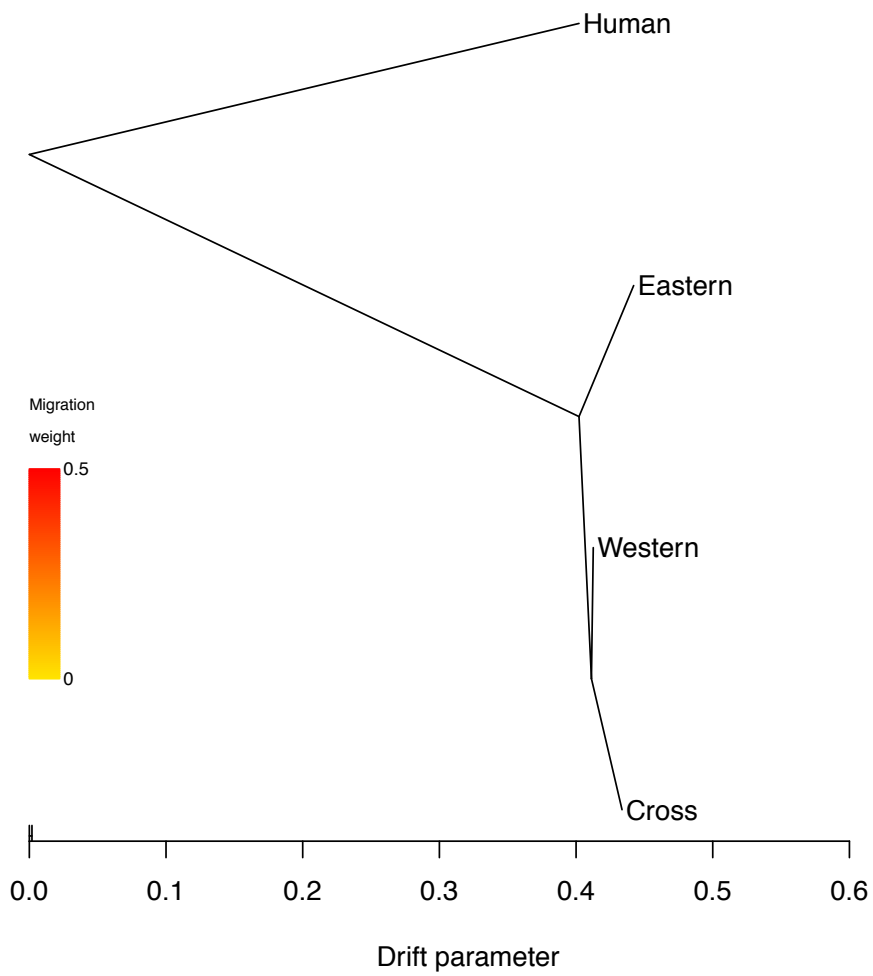

**Figure S6: Four-population phylogeny as inferred by TreeMix (Pickrell and Pritchard, 2012).** The tree was inferred using reference-free genotypes obtained using BSNP at putatively unlinked neutrally evolving loci.

**A.**

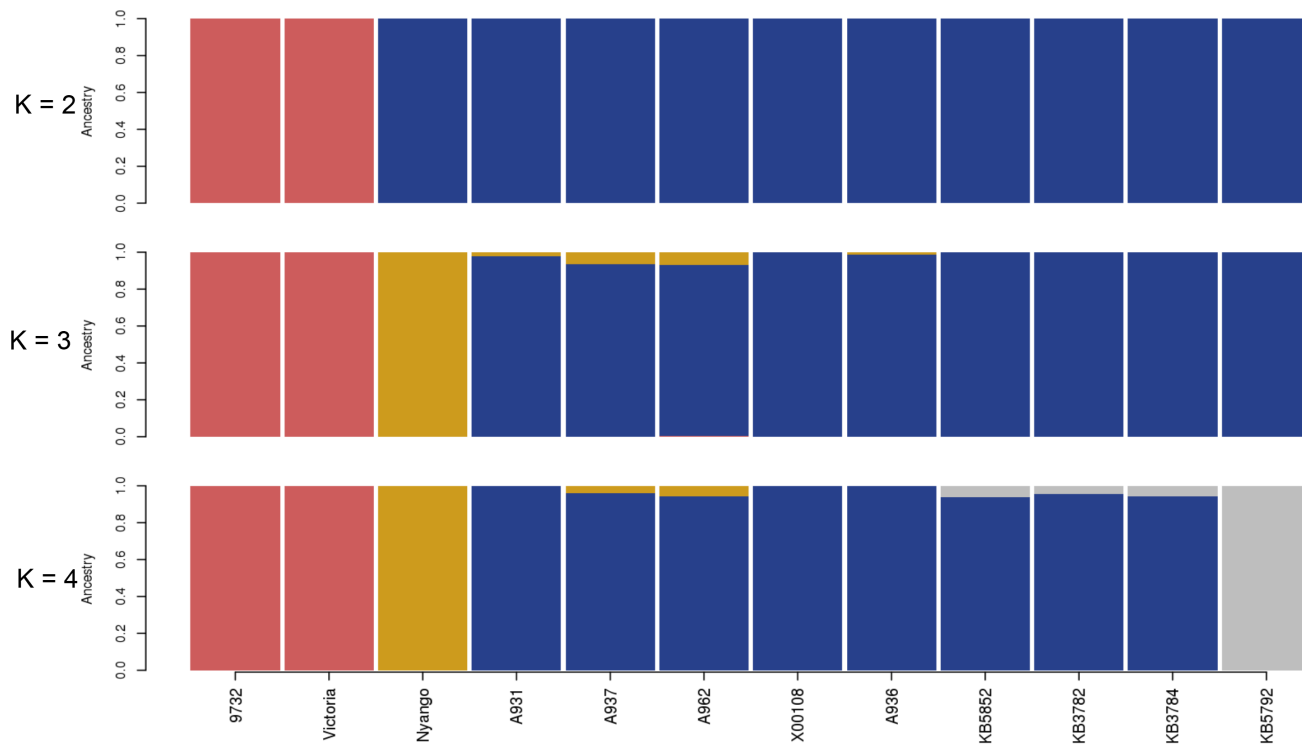

**B.**

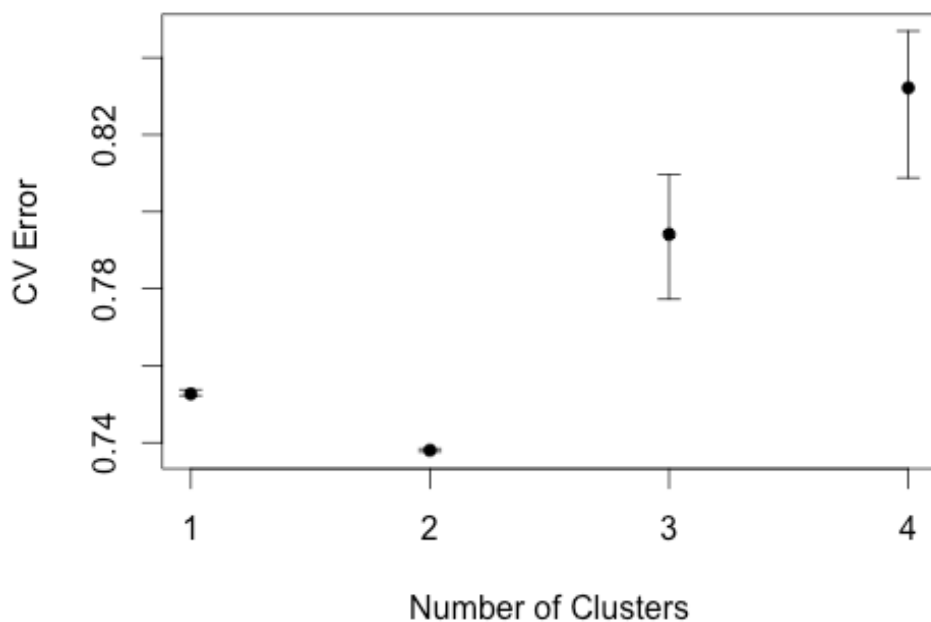

**Figure S7: Admixture analysis for subset of samples used in G-PhoCS analysis.**

Results are based on reference-free genotypes obtained using BSNP at putatively unlinked neutrally evolving loci.
